# Supplementary material for: Enhanced conversion reaction kinetics in low crystallinity SnO2/CNT anodes for Na-ion batteries
Source: Royal Society of Chemistry journal article supplement (doi:10.1039/c6ta03541h), 2016-01-01
Supplement: c6ta03541h2.pdf [file c6ta03541h2.pdf]

## Supporting Information

### **Enhanced conversion reaction kinetics in low crystallinity SnO<sub>2</sub>/CNT anodes for Na-ion batteries**

Jiang Cui,<sup>a, b</sup> Zheng-Long Xu,<sup>a</sup> Shanshan Yao,<sup>a</sup> Jiaqiang Huang,<sup>a</sup> Jian-Qiu Huang,<sup>a</sup> Sara Abouali,<sup>a</sup> Mohammad Akbari Garakani,<sup>a</sup> Xiaohui Ning<sup>\*b</sup> and Jang-Kyo Kim<sup>\*a</sup>

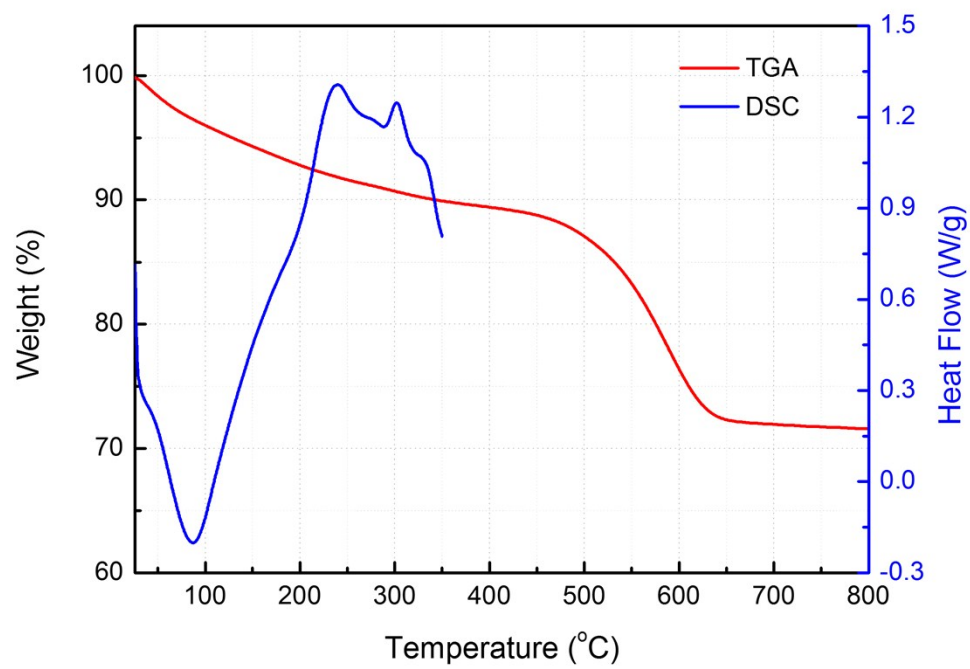

Figure S1 TGA and DSC curves of A-SnO<sub>2</sub>/CNT composites.

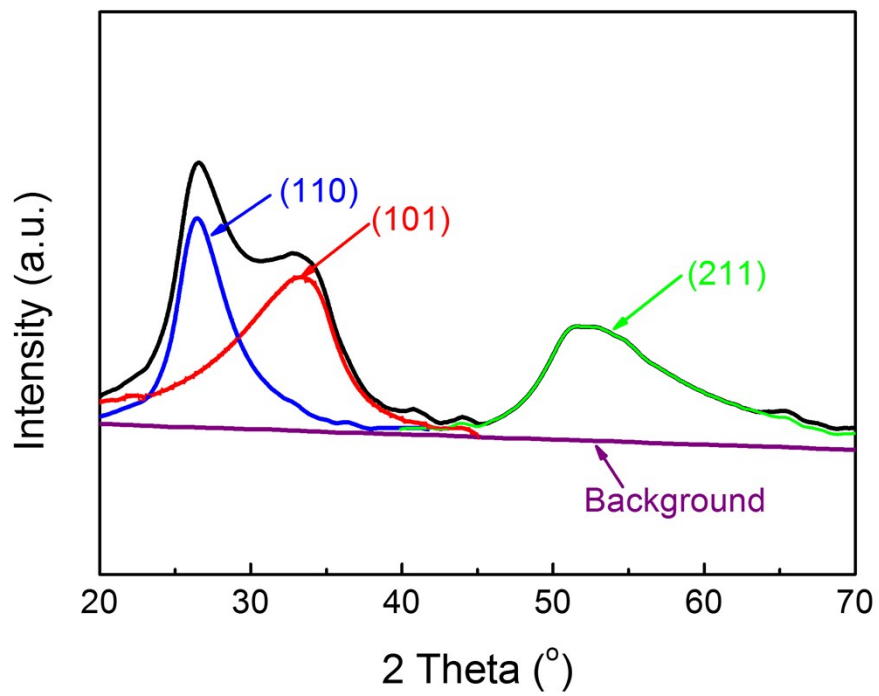

Figure S2 XRD fitting curves of A-SnO<sub>2</sub>/CNT composites.

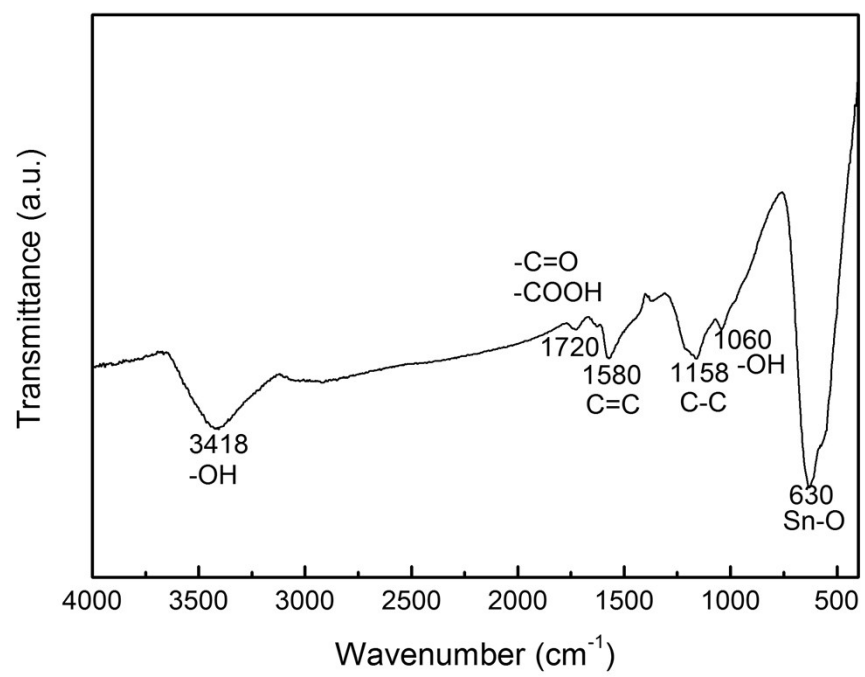

Figure S3 FTIR spectrum of A-SnO<sub>2</sub>/CNT electrodes.

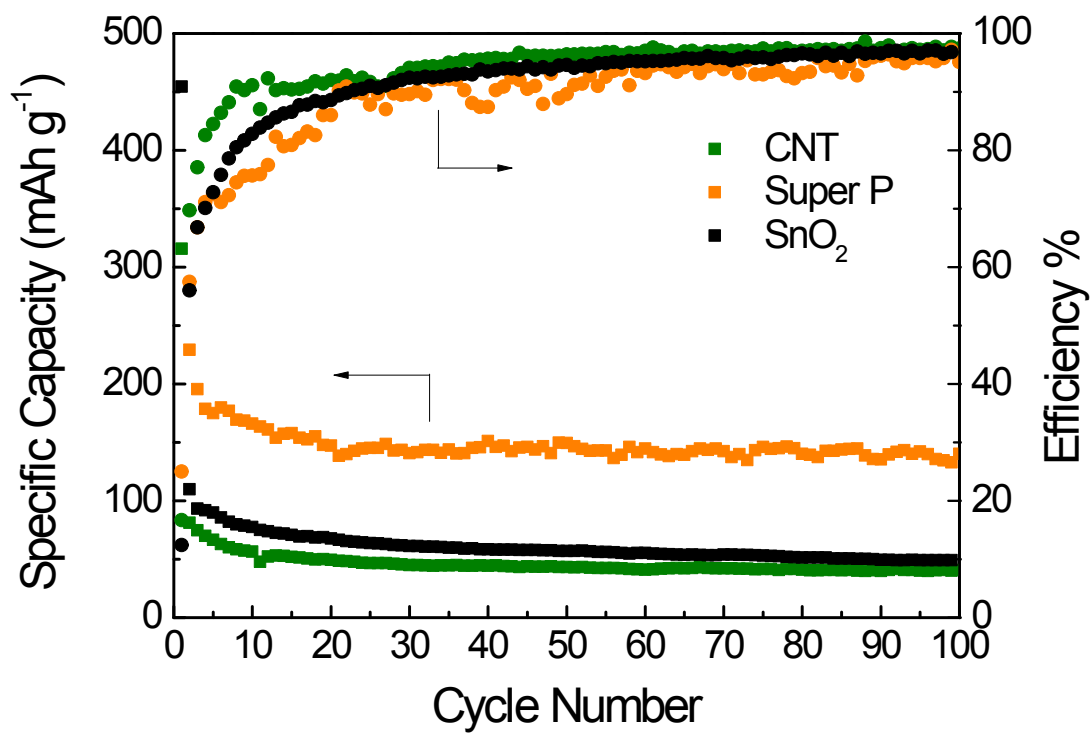

Figure S4 Cyclic performance of pure CNT, Super P and SnO<sub>2</sub> under current density of 0.1 A g<sup>-1</sup>.

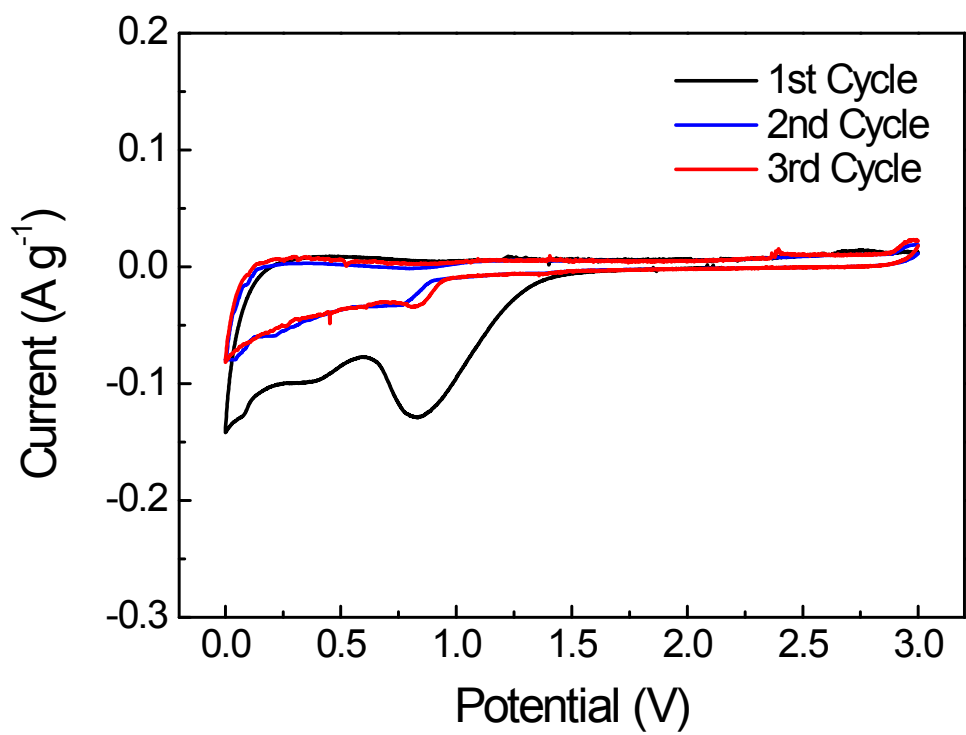

Figure S5 CV curves of pure CNT electrodes at a scan rate of 0.1 mV s<sup>-1</sup>.

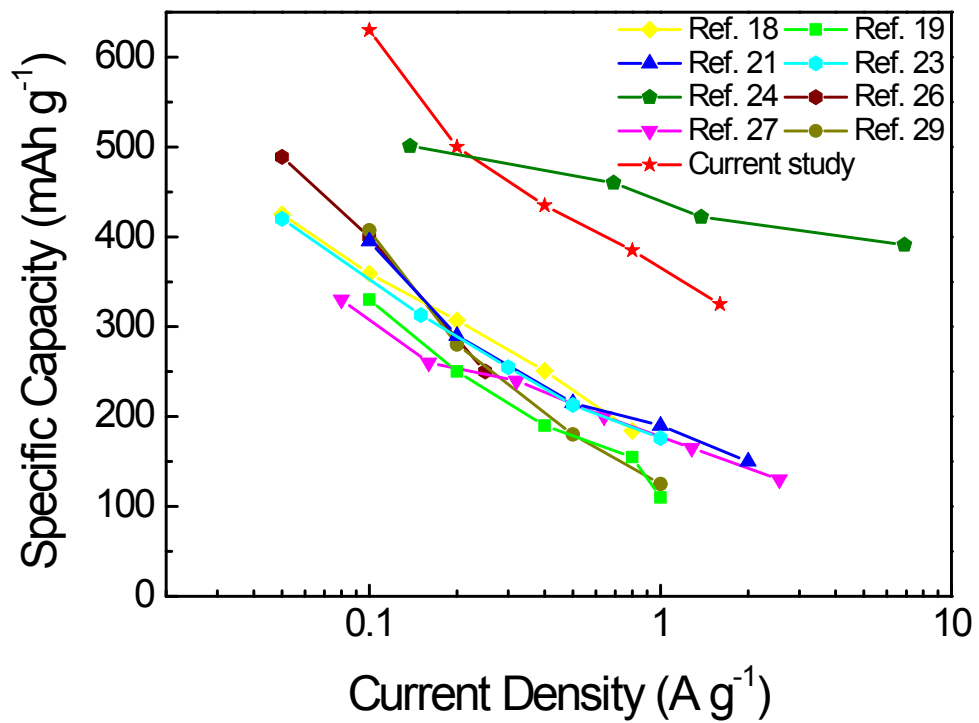

Figure S6 Comparison of specific capacities between the current A-SnO<sub>2</sub>/CNT and SnO<sub>2</sub>-based anodes taken from the literature.

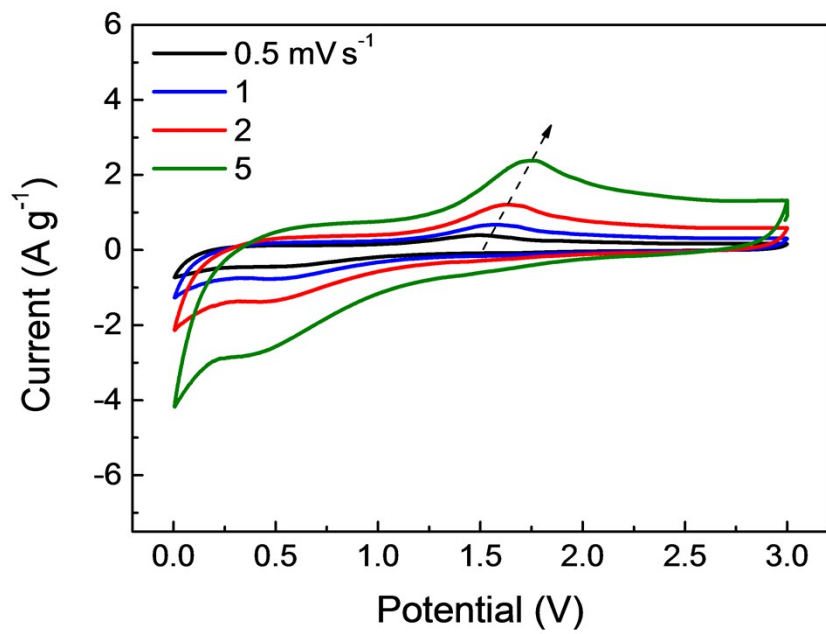

Figure S7 CV curves of C-SnO<sub>2</sub>/CNT electrodes at different scan rates.



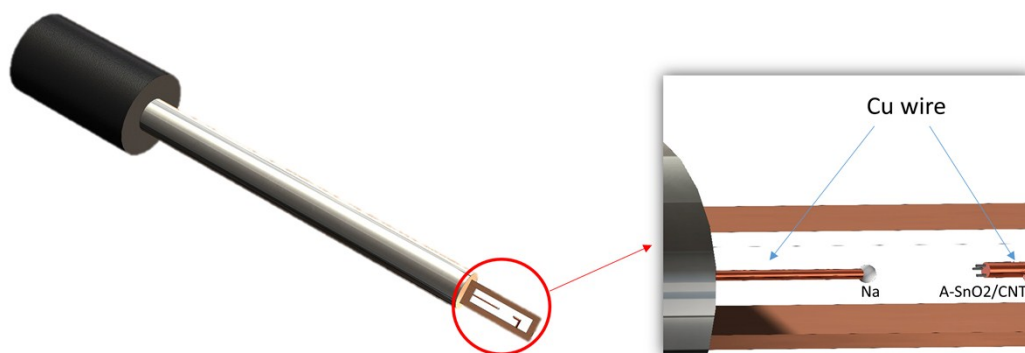

Figure S8 Schematic illustration of *in situ* electrochemical test setup.

Table S1 Comparison of cyclic performance of SnO<sub>2</sub>-based anodes in SIBs.

| Materials                   | Initial reversible capacity              |                                      | Cyclic performance                       |              | Ref.          |
|-----------------------------|------------------------------------------|--------------------------------------|------------------------------------------|--------------|---------------|
|                             | Specific capacity (mAh g <sup>-1</sup> ) | Current density (A g <sup>-1</sup> ) | Specific capacity (mAh g <sup>-1</sup> ) | Cycle Number |               |
| PCNF/SnO <sub>2</sub> /C    | 452                                      | 0.05                                 | 374                                      | 100          | 18            |
| SnO <sub>2</sub> /PANI      | ~280                                     | 0.05                                 | 214                                      | 400          | 19            |
| SnO <sub>2</sub> /C         | 412                                      | 0.05                                 | 239                                      | 50           | 20            |
| SnO <sub>2</sub> /G aerogel | 380                                      | 0.05                                 | 221                                      | 200          | 21            |
| SnO <sub>2</sub> /CNT/C     | 452                                      | 0.05                                 | 200                                      | 300          | 23            |
| C/SnO <sub>2</sub> /CC      | 522                                      | 0.134                                | 313                                      | 100          | 24            |
| SnO <sub>2</sub> /MWCNT     | 489                                      | 0.05                                 | 352                                      | 50           | 26            |
| SnO <sub>2</sub> /C         | 531                                      | 0.08                                 | 430                                      | 200          | 27            |
| SnO <sub>2</sub> thin film  | 300                                      | 0.1                                  | 200                                      | 100          | 28            |
| SnO <sub>2</sub> /rGO       | 407                                      | 0.1                                  | 330                                      | 150          | 29            |
| SnO <sub>2</sub> /CNT       | 630                                      | 0.1                                  | 453                                      | 100          | Current study |
|                             | 324                                      | 1.6                                  | 223                                      | 300          | study         |
